# Supplementary material for: Fertility of a spontaneous hexaploid male Siberian sturgeon, Acipenser baerii
Source: PubMed Central journal article supplement (PMC3893428; doi:10.1186/1471-2156-15-5), 2014-01-10
Supplement: 1471-2156-15-5-S1.pdf [file 1471-2156-15-5-S1.pdf]

| Sample                           | Marker | Allele 1 | Allele 2 | Allele 3 | Allele 4 |
|----------------------------------|--------|----------|----------|----------|----------|
| <i>A. gueldenstaedtii</i> female | Afu19  |          | 129      | 135      | 144      |
| <i>A. baerii</i> hexaploid male  | Afu19  | 120      |          | 135      |          |
| progeny 1                        | Afu19  | 120      | 129      | 135      | 144      |
| progeny 2                        | Afu19  | 120      |          | 135      | 144      |
| progeny 3                        | Afu19  | 120      |          | 135      | 144      |
| progeny 4                        | Afu19  | 129      |          | 135      | 144      |
| progeny 5                        | Afu19  | 120      |          | 135      | 144      |
| progeny 6                        | Afu19  | 120      |          | 135      | 144      |
| progeny 7                        | Afu19  |          |          | 135      | 144      |
| progeny 8                        | Afu19  |          |          | 135      | 144      |
| progeny 9                        | Afu19  |          |          | 135      | 144      |
| progeny 10                       | Afu19  | 120      |          | 135      | 144      |
| progeny 11                       | Afu19  | 120      | 129      | 135      | 144      |
| progeny 12                       | Afu19  | 120      | 129      | 135      |          |
| progeny 13                       | Afu19  | 120      |          | 135      | 144      |
| progeny 14                       | Afu19  | 120      |          | 135      | 144      |
| progeny 15                       | Afu19  | 120      |          | 135      | 144      |
| progeny 16                       | Afu19  | 120      |          | 135      | 144      |
| progeny 17                       | Afu19  | 120      | 129      | 135      | 144      |
| progeny 18                       | Afu19  | 120      |          | 135      | 144      |
| progeny 19                       | Afu19  | 120      | 129      | 135      | 144      |
| progeny 20                       | Afu19  | 120      |          | 135      | 144      |
| progeny 21                       | Afu19  | 120      | 129      | 135      |          |
| progeny 22                       | Afu19  | 120      | 129      | 135      | 144      |

| Sample                           | Marker | Allele 1 | Allele 2 | Allele3 |
|----------------------------------|--------|----------|----------|---------|
| <i>A. gueldenstaedtii</i> female | Afu34  | 130      | 136      | 139     |
| <i>A. baerii</i> hexaploid male  | Afu34  | 130      | 136      | 139     |
| progeny 1                        | Afu34  |          |          |         |
| progeny 2                        | Afu34  |          | 136      | 139     |
| progeny 3                        | Afu34  | 130      | 136      | 139     |
| progeny 4                        | Afu34  |          | 136      | 139     |
| progeny 5                        | Afu34  | 130      | 136      | 139     |
| progeny 6                        | Afu34  | 130      | 136      | 139     |
| progeny 7                        | Afu34  | 130      | 136      | 139     |
| progeny 8                        | Afu34  | 130      | 136      | 139     |
| progeny 9                        | Afu34  | 130      | 136      | 139     |
| progeny 10                       | Afu34  | 130      | 136      | 139     |
| progeny 11                       | Afu34  | 130      | 136      | 139     |
| progeny 12                       | Afu34  | 130      | 136      | 139     |
| progeny 13                       | Afu34  | 130      | 136      |         |
| progeny 14                       | Afu34  | 130      | 136      | 139     |
| progeny 15                       | Afu34  | 130      | 136      | 139     |
| progeny 16                       | Afu34  |          | 136      | 139     |
| progeny 17                       | Afu34  | 130      | 136      | 139     |
| progeny 18                       | Afu34  |          | 136      | 139     |
| progeny 19                       | Afu34  |          | 136      | 139     |
| progeny 20                       | Afu34  |          | 136      | 139     |
| progeny 21                       | Afu34  | 130      | 136      | 139     |
| progeny 22                       | Afu34  |          | 136      | 139     |

| Sample                           | Marker | Allele 1 | Allele2 | Allele 3 | Allele 4 | Allele 5 |
|----------------------------------|--------|----------|---------|----------|----------|----------|
| <i>A. gueldenstaedtii</i> female | Afu39  |          | 122     |          | 128      | 150      |
| <i>A. baerii</i> hexaploid male  | Afu39  | 119      |         | 125      | 128      |          |
| progeny 1                        | Afu39  |          | 122     |          | 128      |          |
| progeny 2                        | Afu39  |          |         | 125      | 128      | 150      |
| progeny 3                        | Afu39  |          |         | 125      | 128      | 150      |
| progeny 4                        | Afu39  | 119      |         | 125      | 128      |          |
| progeny 5                        | Afu39  |          |         | 125      | 128      | 150      |
| progeny 6                        | Afu39  |          |         |          | 128      |          |
| progeny 7                        | Afu39  |          | 122     | 125      | 128      |          |
| progeny 8                        | Afu39  | 119      |         | 125      | 128      | 150      |
| progeny 9                        | Afu39  |          | 122     | 125      | 128      |          |
| progeny 10                       | Afu39  |          | 122     | 125      | 128      |          |
| progeny 11                       | Afu39  | 119      |         | 125      | 128      |          |
| progeny 12                       | Afu39  |          |         | 125      | 128      | 150      |
| progeny 13                       | Afu39  | 119      |         | 125      | 128      |          |
| progeny 14                       | Afu39  | 119      | 122     | 125      | 128      |          |
| progeny 15                       | Afu39  |          | 122     | 125      | 128      | 150      |
| progeny 16                       | Afu39  |          | 122     | 125      | 128      | 150      |
| progeny 17                       | Afu39  | 119      | 122     | 125      | 128      |          |
| progeny 18                       | Afu39  |          | 122     | 125      | 128      |          |
| progeny 19                       | Afu39  |          | 122     | 125      | 128      |          |
| progeny 20                       | Afu39  | 119      |         | 125      | 128      | 150      |
| progeny 21                       | Afu39  |          | 122     | 125      | 128      |          |
| progeny 22                       | Afu39  | 119      | 122     | 125      | 128      |          |

| Sample                           | Marker | Allele 1 | Allele 2 | Allele 3 | Allele 4 | Allele 5 | Allele 6 | Allele 7 | Allele 8 | Allele 9 |
|----------------------------------|--------|----------|----------|----------|----------|----------|----------|----------|----------|----------|
| <i>A. gueldenstaedtii</i> female | Afu68  | 136      |          |          | 156      |          | 192      |          |          | 240      |
| <i>A. baerii</i> hexaploid male  | Afu68  |          | 140      | 152      |          | 180      |          | 200      | 232      |          |
| progeny 1                        | Afu68  | 136      | 140      | 152      |          | 180      |          |          |          | 240      |
| progeny 2                        | Afu68  |          |          |          | 156      |          |          | 200      | 232      | 240      |
| progeny 3                        | Afu68  | 136      | 140      | 152      |          |          | 192      |          | 232      |          |
| progeny 4                        | Afu68  | 136      |          | 152      |          |          |          | 200      | 232      | 240      |
| progeny 5                        | Afu68  |          | 140      | 152      | 156      | 180      |          |          |          | 240      |
| progeny 6                        | Afu68  | 136      | 140      | 152      |          |          | 192      |          | 232      |          |
| progeny 7                        | Afu68  | 136      | 140      |          |          |          |          | 200      | 232      | 240      |
| progeny 8                        | Afu68  |          |          | 152      | 156      | 180      |          |          | 232      | 240      |
| progeny 9                        | Afu68  | 136      |          |          |          | 180      |          |          | 232      | 240      |
| progeny 10                       | Afu68  |          |          | 152      | 156      | 180      |          | 200      |          | 240      |
| progeny 11                       | Afu68  | 136      | 140      |          |          |          | 192      |          | 232      |          |
| progeny 12                       | Afu68  |          |          | 152      | 156      |          | 192      | 200      | 232      |          |
| progeny 13                       | Afu68  |          | 140      |          | 156      |          | 192      |          | 232      |          |
| progeny 14                       | Afu68  | 136      |          | 152      |          |          | 192      |          | 232      |          |
| progeny 15                       | Afu68  | 136      | 140      |          |          |          | 192      | 200      | 232      |          |
| progeny 16                       | Afu68  |          |          |          | 156      |          | 192      | 200      | 232      |          |
| progeny 17                       | Afu68  | 136      |          | 152      |          |          |          |          | 232      | 240      |
| progeny 18                       | Afu68  | 136      | 140      |          |          | 180      | 192      | 200      |          |          |
| progeny 19                       | Afu68  | 136      |          | 152      |          | 180      | 192      |          | 232      |          |
| progeny 20                       | Afu68  | 136      | 140      |          |          | 180      | 192      |          | 232      |          |
| progeny 21                       | Afu68  | 136      |          |          |          | 180      |          |          | 232      | 240      |
| progeny 22                       | Afu68  |          | 140      | 152      | 156      |          | 192      | 200      |          |          |

| Sample                           | Marker | Allele 1 | Allele 2 | Allele 3 | Allele 4 | Allele 5 | Allele 6 | Allele 7 | Allele 8 | Allele 9 |
|----------------------------------|--------|----------|----------|----------|----------|----------|----------|----------|----------|----------|
| <i>A. gueldenstaedtii</i> female | Aox45  | 121      |          |          |          | 142      | 145      |          |          | 157      |
| <i>A. baerii</i> hexaploid male  | Aox45  |          | 124      | 127      | 136      | 142      |          | 148      | 151      |          |
| progeny 1                        | Aox45  | 121      | 124      |          |          |          | 145      | 148      | 151      |          |
| progeny 2                        | Aox45  | 121      | 124      |          | 136      | 142      |          |          | 151      |          |
| progeny 3                        | Aox45  |          |          |          | 136      | 142      |          | 148      |          | 157      |
| progeny 4                        | Aox45  |          |          | 127      |          | 142      |          | 148      |          | 157      |
| progeny 5                        | Aox45  |          | 124      |          |          | 142      |          |          | 151      | 157      |
| progeny 6                        | Aox45  | 121      | 124      | 127      |          |          | 145      |          | 151      |          |
| progeny 7                        | Aox45  | 121      | 124      |          |          |          | 145      | 148      | 151      |          |
| progeny 8                        | Aox45  |          | 124      |          |          |          | 145      | 148      | 151      | 157      |
| progeny 9                        | Aox45  |          |          | 127      |          | 142      |          | 148      |          | 157      |
| progeny 10                       | Aox45  |          | 124      | 127      |          | 142      | 145      |          |          | 157      |
| progeny 11                       | Aox45  | 121      | 124      | 127      | 136      |          |          |          |          | 157      |
| progeny 12                       | Aox45  | 121      | 124      |          |          | 142      |          |          | 151      | 157      |
| progeny 13                       | Aox45  |          | 124      | 127      |          | 142      |          |          | 151      | 157      |
| progeny 14                       | Aox45  | 121      | 124      |          | 136      | 142      |          |          | 151      |          |
| progeny 15                       | Aox45  |          | 124      |          | 136      | 142      |          |          |          | 157      |
| progeny 16                       | Aox45  | 121      | 124      |          | 136      | 142      |          | 148      |          |          |
| progeny 17                       | Aox45  | 121      |          | 127      |          | 142      | 145      |          | 151      |          |
| progeny 18                       | Aox45  |          |          | 127      |          | 142      | 145      | 148      |          | 157      |
| progeny 19                       | Aox45  | 121      | 124      |          | 136      | 142      |          |          | 151      |          |
| progeny 20                       | Aox45  | 121      | 124      | 127      |          |          | 145      |          | 151      |          |
| progeny 21                       | Aox45  |          | 124      | 127      |          | 142      |          |          | 151      | 157      |
| progeny 22                       | Aox45  |          |          | 127      |          | 142      |          | 148      |          | 157      |

| Sample                           | Marker | Allele 1 | Allele 2 | Allele 3 | Allele 4 |
|----------------------------------|--------|----------|----------|----------|----------|
| <i>A. gueldenstaedtii</i> female | Spl101 | 296      | 300      |          | 308      |
| <i>A. baerii</i> hexaploid male  | Spl101 |          | 300      | 304      | 308      |
| progeny 1                        | Spl101 | 296      | 300      | 304      | 308      |
| progeny 2                        | Spl101 | 296      | 300      | 304      | 308      |
| progeny 3                        | Spl101 | 296      | 300      | 304      | 308      |
| progeny 4                        | Spl101 | 296      | 300      | 304      | 308      |
| progeny 5                        | Spl101 | 296      | 300      | 304      | 308      |
| progeny 6                        | Spl101 | 296      | 300      | 304      | 308      |
| progeny 7                        | Spl101 | 296      | 300      | 304      | 308      |
| progeny 8                        | Spl101 |          | 300      | 304      | 308      |
| progeny 9                        | Spl101 | 296      | 300      | 304      | 308      |
| progeny 10                       | Spl101 | 296      |          | 304      | 308      |
| progeny 11                       | Spl101 | 296      | 300      | 304      | 308      |
| progeny 12                       | Spl101 | 296      | 300      | 304      |          |
| progeny 13                       | Spl101 | 296      | 300      | 304      | 308      |
| progeny 14                       | Spl101 | 296      | 300      | 304      | 308      |
| progeny 15                       | Spl101 | 296      | 300      | 304      | 308      |
| progeny 16                       | Spl101 | 296      | 300      | 304      | 308      |
| progeny 17                       | Spl101 | 296      | 300      | 304      | 308      |
| progeny 18                       | Spl101 | 296      | 300      | 304      | 308      |
| progeny 19                       | Spl101 | 296      | 300      | 304      | 308      |
| progeny 20                       | Spl101 | 296      | 300      | 304      | 308      |
| progeny 21                       | Spl101 | 296      | 300      | 304      | 308      |
| progeny 22                       | Spl101 | 296      | 300      | 304      | 308      |

| Sample                           | Marker | Allele 1 | Allele 2 | Allele 3 | Allele 4 | Allele 5 | Allele 6 | Allele 7 |
|----------------------------------|--------|----------|----------|----------|----------|----------|----------|----------|
| <i>A. gueldenstaedtii</i> female | Spl173 |          | 228      | 232      | 236      |          |          | 248      |
| <i>A. baerii</i> hexaploid male  | Spl173 | 224      |          |          | 236      | 240      | 244      |          |
| progeny 1                        | Spl173 | 224      |          | 232      | 236      | 240      | 244      |          |
| progeny 2                        | Spl173 | 224      | 228      | 232      |          | 240      | 244      |          |
| progeny 3                        | Spl173 | 224      | 228      |          | 236      | 240      |          |          |
| progeny 4                        | Spl173 | 224      | 228      |          | 236      |          | 244      | 248      |
| progeny 5                        | Spl173 |          | 228      | 232      | 236      | 240      | 244      |          |
| progeny 6                        | Spl173 |          |          | 232      | 236      | 240      | 244      |          |
| progeny 7                        | Spl173 |          |          | 232      | 236      | 240      |          |          |
| progeny 8                        | Spl173 | 224      |          |          | 236      | 240      | 244      | 248      |
| progeny 9                        | Spl173 | 224      |          | 232      | 236      | 240      |          |          |
| progeny 10                       | Spl173 | 224      | 228      |          | 236      | 240      |          | 248      |
| progeny 11                       | Spl173 | 224      |          | 232      |          | 240      | 244      | 248      |
| progeny 12                       | Spl173 |          |          | 232      | 236      | 240      | 244      |          |
| progeny 13                       | Spl173 | 224      | 228      |          | 236      | 240      |          |          |
| progeny 14                       | Spl173 |          |          |          | 236      | 240      | 244      | 248      |
| progeny 15                       | Spl173 | 224      |          | 232      | 236      | 240      |          |          |
| progeny 16                       | Spl173 | 224      | 228      |          | 236      | 240      | 244      |          |
| progeny 17                       | Spl173 | 224      | 228      |          | 236      | 240      | 244      |          |
| progeny 18                       | Spl173 | 224      | 228      | 232      | 236      | 240      |          |          |
| progeny 19                       | Spl173 |          | 228      |          | 236      | 240      | 244      |          |
| progeny 20                       | Spl173 |          | 228      |          | 236      | 240      | 244      | 248      |
| progeny 21                       | Spl173 |          |          | 232      | 236      | 240      | 244      |          |
| progeny 22                       | Spl173 | 224      |          | 232      | 236      | 240      |          | 248      |

| Sample                          | Marker | Allele 1 | Allele 2 |
|---------------------------------|--------|----------|----------|
| <i>A. baerii</i> female         | Afu19  |          | 135      |
| <i>A. baerii</i> hexaploid male | Afu19  | 120      | 135      |
| progeny 1                       | Afu19  | 120      | 135      |
| progeny 2                       | Afu19  | 120      | 135      |
| progeny 3                       | Afu19  |          | 135      |
| progeny 4                       | Afu19  | 120      | 135      |
| progeny 5                       | Afu19  | 120      | 135      |
| progeny 6                       | Afu19  | 120      | 135      |
| progeny 7                       | Afu19  | 120      | 135      |
| progeny 8                       | Afu19  | 120      | 135      |
| progeny 9                       | Afu19  | 120      | 135      |
| progeny 10                      | Afu19  |          | 135      |
| progeny 11                      | Afu19  |          | 135      |
| progeny 12                      | Afu19  |          | 135      |
| progeny 13                      | Afu19  |          | 135      |
| progeny 14                      | Afu19  |          | 135      |
| progeny 15                      | Afu19  | 120      | 135      |
| progeny 16                      | Afu19  | 120      | 135      |
| progeny 17                      | Afu19  | 120      | 135      |
| progeny 18                      | Afu19  | 120      | 135      |
| progeny 19                      | Afu19  | 120      | 135      |
| progeny 20                      | Afu19  | 120      | 135      |
| progeny 21                      | Afu19  | 120      | 135      |
| progeny 22                      | Afu19  | 120      | 135      |



| Sample                          | Marker | Allele 1 | Allele 2 | Allele 3 |
|---------------------------------|--------|----------|----------|----------|
| <i>A. baerii</i> female         | Afu34  | 130      | 136      |          |
| <i>A. baerii</i> hexaploid male | Afu34  | 130      | 136      | 139      |
| progeny 1                       | Afu34  |          | 136      | 139      |
| progeny 2                       | Afu34  | 130      | 136      | 139      |
| progeny 3                       | Afu34  | 130      | 136      | 139      |
| progeny 4                       | Afu34  |          | 136      | 139      |
| progeny 5                       | Afu34  | 130      | 136      | 139      |
| progeny 6                       | Afu34  |          | 136      | 139      |
| progeny 7                       | Afu34  | 130      | 136      | 139      |
| progeny 8                       | Afu34  | 130      | 136      | 139      |
| progeny 9                       | Afu34  | 130      | 136      | 139      |
| progeny 10                      | Afu34  |          | 136      | 139      |
| progeny 11                      | Afu34  | 130      | 136      | 139      |
| progeny 12                      | Afu34  | 130      | 136      | 139      |
| progeny 13                      | Afu34  |          | 136      | 139      |
| progeny 14                      | Afu34  | 130      | 136      | 139      |
| progeny 15                      | Afu34  | 130      | 136      | 139      |
| progeny 16                      | Afu34  | 130      | 136      | 139      |
| progeny 17                      | Afu34  | 130      | 136      | 139      |
| progeny 18                      | Afu34  |          | 136      | 139      |
| progeny 19                      | Afu34  | 130      | 136      | 139      |
| progeny 20                      | Afu34  | 130      | 136      | 139      |
| progeny 21                      | Afu34  |          | 136      | 139      |
| progeny 22                      | Afu34  | 130      | 136      | 139      |

| Sample                          | Marker | Allele 1 | Allele 2 | Allele 3 | Allele 4 |
|---------------------------------|--------|----------|----------|----------|----------|
| <i>A. baerii</i> female         | Afu39  |          | 125      | 128      | 144      |
| <i>A. baerii</i> hexaploid male | Afu39  | 119      | 125      | 128      |          |
| progeny 1                       | Afu39  | 119      | 125      | 128      |          |
| progeny 2                       | Afu39  |          | 125      | 128      | 144      |
| progeny 3                       | Afu39  |          | 125      | 128      | 144      |
| progeny 4                       | Afu39  |          | 125      | 128      | 144      |
| progeny 5                       | Afu39  |          | 125      | 128      | 144      |
| progeny 6                       | Afu39  |          | 125      | 128      | 144      |
| progeny 7                       | Afu39  |          | 125      | 128      |          |
| progeny 8                       | Afu39  |          | 125      | 128      | 144      |
| progeny 9                       | Afu39  | 119      | 125      | 128      |          |
| progeny 10                      | Afu39  | 119      | 125      | 128      | 144      |
| progeny 11                      | Afu39  |          | 125      | 128      | 144      |
| progeny 12                      | Afu39  |          | 125      | 128      |          |
| progeny 13                      | Afu39  | 119      | 125      | 128      |          |
| progeny 14                      | Afu39  | 119      | 125      | 128      | 144      |
| progeny 15                      | Afu39  |          | 125      | 128      | 144      |
| progeny 16                      | Afu39  | 119      | 125      | 128      |          |
| progeny 17                      | Afu39  | 119      | 125      | 128      | 144      |
| progeny 18                      | Afu39  |          | 125      | 128      | 144      |
| progeny 19                      | Afu39  | 119      | 125      | 128      | 144      |
| progeny 20                      | Afu39  | 119      | 125      | 128      | 144      |
| progeny 21                      | Afu39  |          | 125      | 128      |          |
| progeny 22                      | Afu39  | 119      | 125      | 128      | 144      |

| Sample                          | Marker | Allele 1 | Allele 2 | Allele 3 | Allele 4 | Allele 5 | Allele 6 |
|---------------------------------|--------|----------|----------|----------|----------|----------|----------|
| <i>A. baerii</i> female         | Afu68  |          | 152      | 160      |          | 200      | 232      |
| <i>A. baerii</i> hexaploid male | Afu68  | 140      | 152      |          | 180      | 200      | 232      |
| progeny 1                       | Afu68  | 140      | 152      |          | 180      | 200      |          |
| progeny 2                       | Afu68  | 140      |          | 160      | 180      | 200      |          |
| progeny 3                       | Afu68  |          | 152      |          | 180      |          | 232      |
| progeny 4                       | Afu68  |          | 152      | 160      |          | 200      | 232      |
| progeny 5                       | Afu68  | 140      | 152      | 160      | 180      | 200      | 232      |
| progeny 6                       | Afu68  |          | 152      | 160      |          |          | 232      |
| progeny 7                       | Afu68  | 140      |          | 160      |          | 200      | 232      |
| progeny 8                       | Afu68  |          | 152      |          |          | 200      | 232      |
| progeny 9                       | Afu68  | 140      |          | 160      | 180      |          | 232      |
| progeny 10                      | Afu68  |          |          | 160      | 180      |          | 232      |
| progeny 11                      | Afu68  | 140      | 152      |          |          | 200      | 232      |
| progeny 12                      | Afu68  |          | 152      | 160      | 180      | 200      | 232      |
| progeny 13                      | Afu68  | 140      | 152      |          |          |          | 232      |
| progeny 14                      | Afu68  | 140      | 152      | 160      |          | 200      | 232      |
| progeny 15                      | Afu68  | 140      | 152      |          |          | 200      | 232      |
| progeny 16                      | Afu68  | 140      | 152      | 160      |          |          | 232      |
| progeny 17                      | Afu68  |          | 152      |          |          | 200      | 232      |
| progeny 18                      | Afu68  | 140      | 152      |          |          |          | 232      |
| progeny 19                      | Afu68  | 140      | 152      |          | 180      |          | 232      |
| progeny 20                      | Afu68  | 140      | 152      | 160      |          | 200      | 232      |
| progeny 21                      | Afu68  |          |          | 160      |          | 200      | 232      |
| progeny 22                      | Afu68  | 140      | 152      | 160      | 180      | 200      | 232      |

| Sample                          | Marker | Allele 1 | Allele 2 | Allele 3 | Allele 4 | Allele 5 | Allele 6 | Allele 7 |
|---------------------------------|--------|----------|----------|----------|----------|----------|----------|----------|
| <i>A. baerii</i> female         | Aox45  |          | 127      | 130      |          |          | 148      |          |
| <i>A. baerii</i> hexaploid male | Aox45  | 124      | 127      |          | 136      | 142      | 148      | 151      |
| progeny 1                       | Aox45  | 124      |          | 130      |          | 142      | 148      | 151      |
| progeny 2                       | Aox45  |          | 127      |          | 136      | 142      | 148      | 151      |
| progeny 3                       | Aox45  | 124      |          | 130      |          | 142      | 148      | 151      |
| progeny 4                       | Aox45  | 124      | 127      | 130      | 136      | 142      |          |          |
| progeny 5                       | Aox45  |          | 127      | 130      |          | 142      | 148      |          |
| progeny 6                       | Aox45  |          | 127      |          | 136      | 142      | 148      |          |
| progeny 7                       | Aox45  | 124      | 127      | 130      | 136      |          | 148      |          |
| progeny 8                       | Aox45  | 124      | 127      |          |          |          | 148      | 151      |
| progeny 9                       | Aox45  |          | 127      |          | 136      | 142      | 148      |          |
| progeny 10                      | Aox45  |          | 127      |          |          | 142      | 148      |          |
| progeny 11                      | Aox45  |          | 127      | 130      |          | 142      | 148      |          |
| progeny 12                      | Aox45  | 124      |          | 130      | 136      |          | 148      |          |
| progeny 13                      | Aox45  |          | 127      |          | 136      |          | 148      |          |
| progeny 14                      | Aox45  |          |          | 130      | 136      | 142      | 148      |          |
| progeny 15                      | Aox45  |          | 127      |          | 136      |          | 148      |          |
| progeny 16                      | Aox45  |          | 127      | 130      | 136      |          | 148      |          |
| progeny 17                      | Aox45  |          | 127      | 130      | 136      |          | 148      |          |
| progeny 18                      | Aox45  |          | 127      | 130      | 136      |          | 148      |          |
| progeny 19                      | Aox45  |          | 127      |          |          | 142      | 148      | 151      |
| progeny 20                      | Aox45  | 124      | 127      | 130      | 136      |          | 148      |          |
| progeny 21                      | Aox45  | 124      |          | 130      |          |          | 148      | 151      |
| progeny 22                      | Aox45  | 124      | 127      | 130      | 136      |          | 148      |          |

| Sample                          | Marker | Allele 1 | Allele 2 | Allele 3 | Allele 4 | Allele 5 |
|---------------------------------|--------|----------|----------|----------|----------|----------|
| <i>A. baerii</i> female         | Spl101 | 284      |          |          | 308      | 320      |
| <i>A. baerii</i> hexaploid male | Spl101 |          | 300      | 304      | 308      |          |
| progeny 1                       | Spl101 |          |          | 304      | 308      | 320      |
| progeny 2                       | Spl101 | 284      | 300      |          | 308      |          |
| progeny 3                       | Spl101 |          |          | 304      | 308      | 320      |
| progeny 4                       | Spl101 |          | 300      |          | 308      | 320      |
| progeny 5                       | Spl101 | 284      | 300      | 304      | 308      | 320      |
| progeny 6                       | Spl101 |          |          |          | 308      | 320      |
| progeny 7                       | Spl101 | 284      | 300      | 304      | 308      | 320      |
| progeny 8                       | Spl101 |          | 300      |          | 308      | 320      |
| progeny 9                       | Spl101 | 284      | 300      | 304      | 308      | 320      |
| progeny 10                      | Spl101 |          | 300      | 304      | 308      | 320      |
| progeny 11                      | Spl101 |          | 300      | 304      | 308      | 320      |
| progeny 12                      | Spl101 |          |          |          | 308      | 320      |
| progeny 13                      | Spl101 |          |          | 304      | 308      | 320      |
| progeny 14                      | Spl101 |          |          | 304      | 308      | 320      |
| progeny 15                      | Spl101 |          |          |          | 308      | 320      |
| progeny 16                      | Spl101 |          | 300      | 304      | 308      | 320      |
| progeny 17                      | Spl101 | 284      | 300      |          | 308      | 320      |
| progeny 18                      | Spl101 |          |          | 304      | 308      | 320      |
| progeny 19                      | Spl101 | 284      | 300      | 304      | 308      | 320      |
| progeny 20                      | Spl101 | 284      | 300      |          | 308      | 320      |
| progeny 21                      | Spl101 |          | 300      |          | 308      | 320      |
| progeny 22                      | Spl101 | 284      | 300      |          | 308      | 320      |

| Sample                          | Marker | Allele 1 | Allele 2 | Allele 3 | Allele 4 | Allele 5 |
|---------------------------------|--------|----------|----------|----------|----------|----------|
| <i>A. baerii</i> female         | Spl173 | 224      | 236      | 240      |          | 252      |
| <i>A. baerii</i> hexaploid male | Spl173 | 224      | 236      | 240      | 244      |          |
| progeny 1                       | Spl173 | 224      | 236      | 240      |          |          |
| progeny 2                       | Spl173 | 224      | 236      | 240      | 244      |          |
| progeny 3                       | Spl173 |          | 236      | 240      | 244      |          |
| progeny 4                       | Spl173 | 224      |          | 240      | 244      |          |
| progeny 5                       | Spl173 | 224      | 236      | 240      | 244      |          |
| progeny 6                       | Spl173 | 224      | 236      | 240      |          |          |
| progeny 7                       | Spl173 | 224      | 236      | 240      |          | 252      |
| progeny 8                       | Spl173 | 224      | 236      | 240      |          |          |
| progeny 9                       | Spl173 | 224      | 236      | 240      | 244      |          |
| progeny 10                      | Spl173 | 224      |          | 240      |          | 252      |
| progeny 11                      | Spl173 |          | 236      | 240      | 244      |          |
| progeny 12                      | Spl173 | 224      | 236      | 240      | 244      |          |
| progeny 13                      | Spl173 |          | 236      | 240      | 244      | 252      |
| progeny 14                      | Spl173 | 224      | 236      | 240      |          | 252      |
| progeny 15                      | Spl173 | 224      | 236      | 240      | 244      | 252      |
| progeny 16                      | Spl173 | 224      | 236      | 240      | 244      |          |
| progeny 17                      | Spl173 | 224      | 236      | 240      |          |          |
| progeny 18                      | Spl173 | 224      | 236      | 240      |          | 252      |
| progeny 19                      | Spl173 | 224      |          | 240      |          | 252      |
| progeny 20                      | Spl173 | 224      | 236      | 240      | 244      | 252      |
| progeny 21                      | Spl173 | 224      | 236      | 240      | 244      |          |
| progeny 22                      | Spl173 | 224      | 236      | 240      | 244      |          |
